# Supplementary material for: New Variants of the Cytochrome P450 2R1 (CYP2R1) Gene in Individuals with Severe Vitamin D-Activating Enzyme 25(OH)D Deficiency
Source: MDPI journal article supplement (doi:10.3390/biom11121867), 2021-12-12
Supplement: s1 [file s1]

# New Variants of the Cytochrome P450 2R1 (*CYP2R1*) Gene in Individuals with Severe Vitamin D-activating Enzyme 25(OH)D Deficiency

Martyna Fronczek<sup>1,2</sup>, Joanna Katarzyna Strzelczyk<sup>1</sup>, Krzysztof Biernacki<sup>1</sup>, Silvia Salatino<sup>3</sup>, Tadeusz Osadnik<sup>2</sup>, Zofia Ostrowska<sup>1</sup>

**Table S1.** Primer sequences for the cytochrome P450 family 2 subfamily R member 1 (*CYP2R1*) gene.

| Primer Name      | Primer Sequence [5'→ 3']         | Chromosome Position       | Amplicon Length (bp) |
|------------------|----------------------------------|---------------------------|----------------------|
| <i>CYP2R1*1F</i> | 5'-CTGTGTTTCATTTGGCTTTTGGATGC-3' | Ch11: 14878000 - 14878499 | 500                  |
| <i>CYP2R1*1R</i> | 5'-ACAAAAGGAGGTAAATGAATGGGT-3'   |                           |                      |
| <i>CYP2R1*2F</i> | 5'-GTGCATGGCCAAGACTCAAAAAC-3'    | Ch11: 14880058 - 14880883 | 826                  |
| <i>CYP2R1*2R</i> | 5'-TAGGAGGACAATTTGGAGAAGGAT-3'   |                           |                      |
| <i>CYP2R1*3F</i> | 5'-GTCCTTTACACAAACCATGCAAC-3'    | Ch11: 14885321 - 14886113 | 814                  |
| <i>CYP2R1*3R</i> | 5'-GTGACTTTAGGCACTGAATGGC-3'     |                           |                      |

**Table S2.** Reaction conditions for PCR using *CYP2R1\*1F*, *CYP2R1\*1R* and *CYP2R1\*3F*, *CYP2R1\*3R* primer pairs.

| PCR Conditions                                              |                     |                          |                  |              |       |                                               |
|-------------------------------------------------------------|---------------------|--------------------------|------------------|--------------|-------|-----------------------------------------------|
| Reagent                                                     | Volume              | Thermocycling Conditions | Temperature [°C] | Time [mm:ss] | Cycle | Instrument                                    |
| DNA                                                         | 300 ng per reaction | Initial denaturation     | 94               | 03:00        | 1     | SimpliAmp™ ThermalCycler (Thermo Fisher, USA) |
| 10X Optimized DyNAzyme Buffer with 1.5 mM MgCl <sub>2</sub> | 2,5 µL              | Denaturation             | 94               | 00:45        | x 30  |                                               |
| 10 mM dNTPs                                                 | 0,2 µL              | Annealing                | 58               | 00:30        |       |                                               |
| DyNAzyme II DNA Polymerase 2 U/µL                           | 0,6 µL              | Extension                | 72               | 00:45        |       |                                               |
| 10 µM reverse primer                                        | 1 µL                | Final extension          | 72               | 07:00        | 1     |                                               |
| 10 µM forward primer                                        | 1 µL                | Storage                  | 4                | ∞            |       |                                               |
| RNase-free and DNase-free water                             | up to final volume  |                          |                  |              |       |                                               |
| Final reaction volume                                       | 25 µL               |                          |                  |              |       |                                               |

**Table S3.** Reaction conditions for PCR using *CYP2R1\*2F*, *CYP2R1\*2R* primer pair.

| PCR Conditions                                              |                     |                          |                  |              |       |                                               |
|-------------------------------------------------------------|---------------------|--------------------------|------------------|--------------|-------|-----------------------------------------------|
| Reagent                                                     | Volume              | Thermocycling conditions | Temperature [°C] | Time [mm:ss] | Cycle | Instrument                                    |
| DNA                                                         | 300 ng per reaction | Initial denaturation     | 94               | 03:00        | 1     | SimpliAmp™ ThermalCycler (Thermo Fisher, USA) |
| 10X Optimized DyNAzyme Buffer with 1.5 mM MgCl <sub>2</sub> | 2,5 µL              | Denaturation             | 94               | 00:45        | x 30  |                                               |
| 10 mM dNTPs                                                 | 0,2 µL              | Annealing                | 60               | 00:30        |       |                                               |
| DyNAzyme II DNA Polymerase 2 U/µL                           | 0,6 µL              | Extension                | 72               | 00:45        |       |                                               |
| 10µM reverse primer                                         | 1 µL                | Final extension          | 72               | 07:00        | 1     |                                               |
| 10 µM forward primer                                        | 1 µL                | Storage                  | 4                | ∞            |       |                                               |
| RNase-free and DNase-free water                             | up to final volume  |                          |                  |              |       |                                               |
| Final reaction volume                                       | 25 µL               |                          |                  |              |       |                                               |

**Table S4.** Reaction conditions for enzymatic purification of PCR products.

| Reaction Conditions   |        |                          |                  |              |                                               |
|-----------------------|--------|--------------------------|------------------|--------------|-----------------------------------------------|
| Reagent               | Volume | Thermocycling conditions | Temperature [°C] | Time [mm:ss] | Instrument                                    |
| Exo-BAP Mix           | 2 µL   | Enzyme activation        | 37               | 15:00        | SimpliAmp™ ThermalCycler (Thermo Fisher, USA) |
| PCR product           | 5 µL   | Enzyme inactivation      | 80               | 15:00        |                                               |
| Final reaction volume | 25 µL  | Storage                  | 4                | ∞            |                                               |

**Table S5.** Composition of the cycle sequencing reaction mixture.

| PCR Reaction Composition                            |                    |                          | PCR Thermal Conditions |              |                      |                                               |
|-----------------------------------------------------|--------------------|--------------------------|------------------------|--------------|----------------------|-----------------------------------------------|
| Reagent                                             | Volume [μL]        | Thermocycling conditions | Temperature [°C]       | Time [mm:ss] | Cycle                | Instrument                                    |
| BigDye™ Terminator 3.1 Ready Reaction Mix           | 4                  | Initial denaturation     | 96                     | 01:00        | 1                    | SimpliAmp™ ThermalCycler (Thermo Fisher, USA) |
| BigDye™ Terminator v1.1 & v3.1 5X Sequencing Buffer | 2                  | Denaturation             | 96                     | 00:10        | x 25 Ramp rate 1°C/s |                                               |
| Forward/Reverse primer (3.2 μM)                     | 1                  | Annealing                | 50                     | 00:05        |                      |                                               |
| Purified PCR product                                | 10 ng per reaction | Extension                | 60                     | 04:00        |                      |                                               |
| RNase-free and DNase-free water                     | up to final volume | Storage                  | 4                      | ∞            |                      |                                               |
| Final reaction volume                               | 20                 |                          |                        |              |                      |                                               |

**Table S6.** Composition of the reaction mixture for the purification of sequential PCR products.

| Reaction Mixture                |                | Conditions         |            |
|---------------------------------|----------------|--------------------|------------|
| Reagent                         | Volume<br>[μL] | Shaking conditions | Instrument |
| Purified sequencing PCR product | 20             | 2000 rpm           | IKA MS3    |
| BigDye® XTerminator™ Solution   | 20             |                    |            |
| SAM™ Solution                   | 90             |                    |            |
